# Supplementary material for: Snowpack Distribution Using Topographical, Climatological and Winter Season Index Inputs
Source: MDPI journal article supplement (doi:10.3390/atmos13010003), 2021-12-21
Supplement: s1 [file s1]

## Supplementary Materials:

**Douglas M. Hultstrand <sup>1</sup>, Steven R. Fassnacht <sup>2,3,4,\*</sup>, John D. Stednick <sup>5</sup> and Christopher A. Hiemstra <sup>6</sup>**

<sup>1</sup> EASC-Watershed Science, Colorado State University, Fort Collins, CO 80523-1482, USA; douglas.hultstrand@colostate.edu

<sup>2</sup> ESS-Watershed Science, Colorado State University, Fort Collins, CO 80523-1476, USA

<sup>3</sup> Cooperative Institute for Research in the Atmosphere, Fort Collins, CO 80521-1375, USA

<sup>4</sup> Natural Resources Ecology Laboratory, Fort Collins, CO 80523-1499, USA

<sup>5</sup> FRS-Watershed Science, College of Natural Resources, Colorado State University, Fort Collins, CO 80523-1872, USA; john.stednick@colostate.edu

<sup>6</sup> USDA Forest Service, Geospatial Management Office, Salt Lake City, UT 84138-1101; christopher.hiemstra@usda.gov

\* Correspondence: steven.fassnacht@colostate.edu; Tel.: +1-970-491-5454

2006

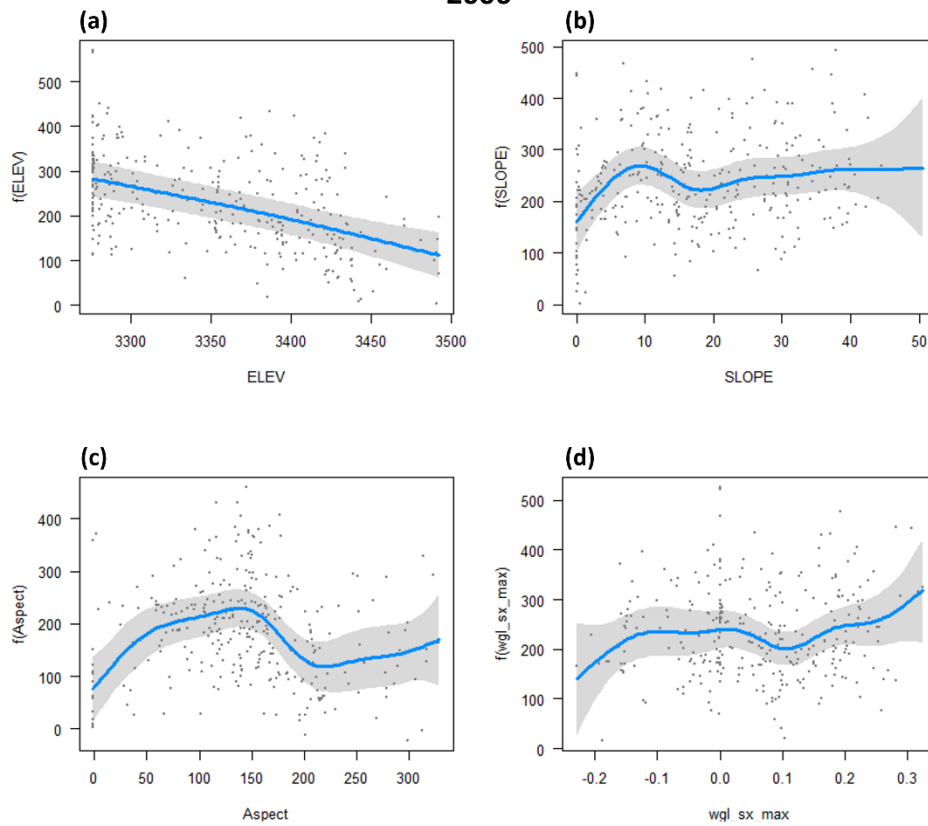

2008

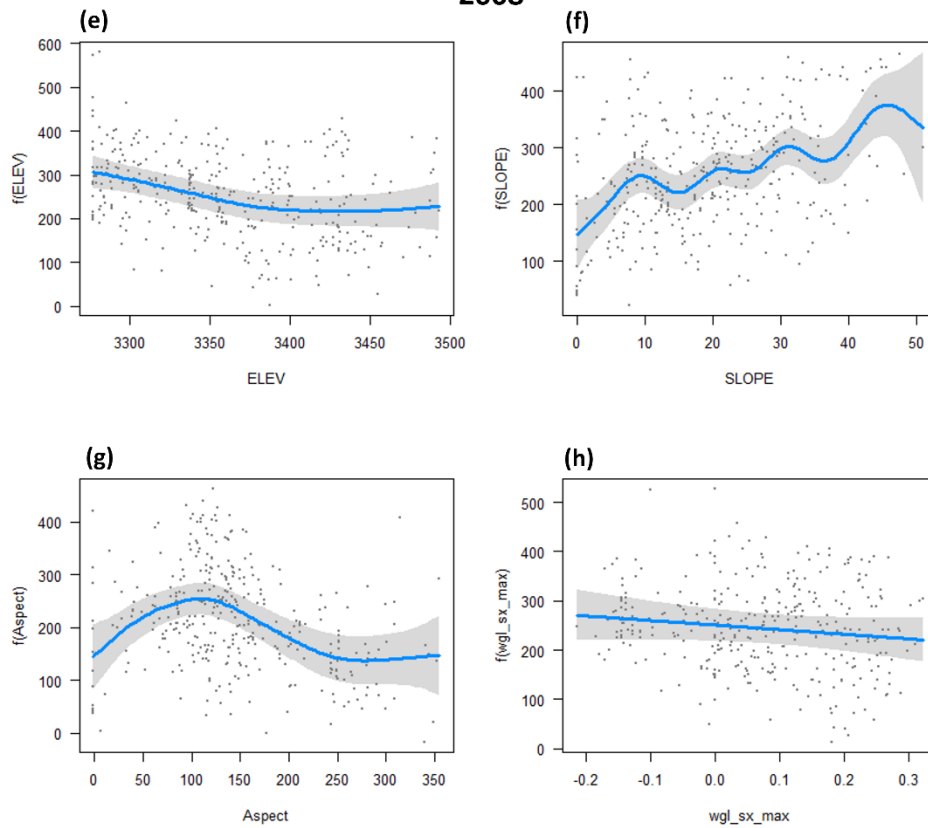

Figure S1. Significant topographic parameters elevation (a and e); slope (b and f); aspect (c and g); and maximum upwind slope (d and h) non-linear relationships to snow depth for sample year 2006 and 2008.

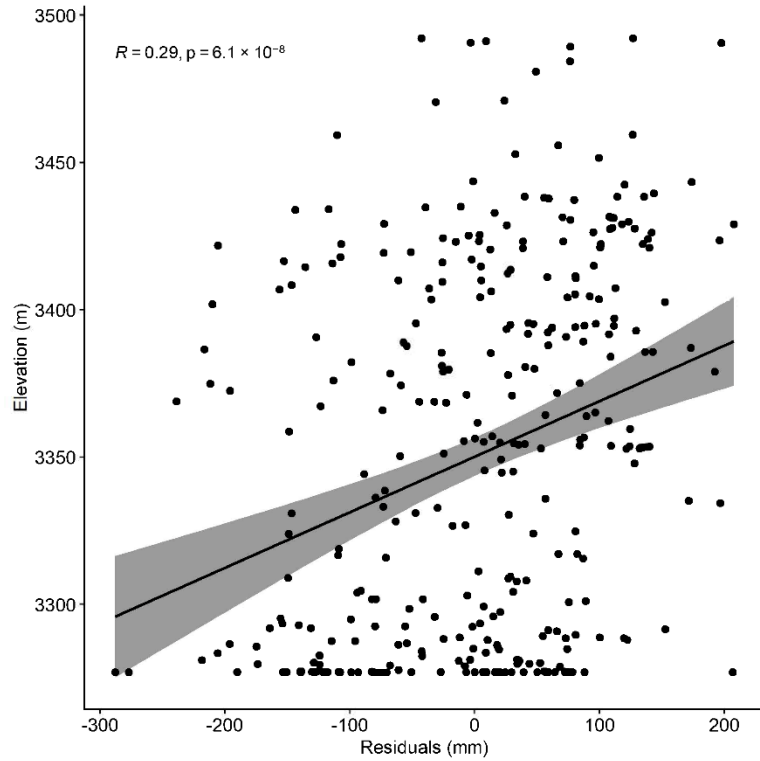

Figure S2. The strongest correlation for all topographic parameters and multi-year models ( $r = 0.29$ ) for the residuals from the multi-year model omitting 2006 versus elevation. All other residual versus topographic parameter correlations (Table 2) were less than 0.19.

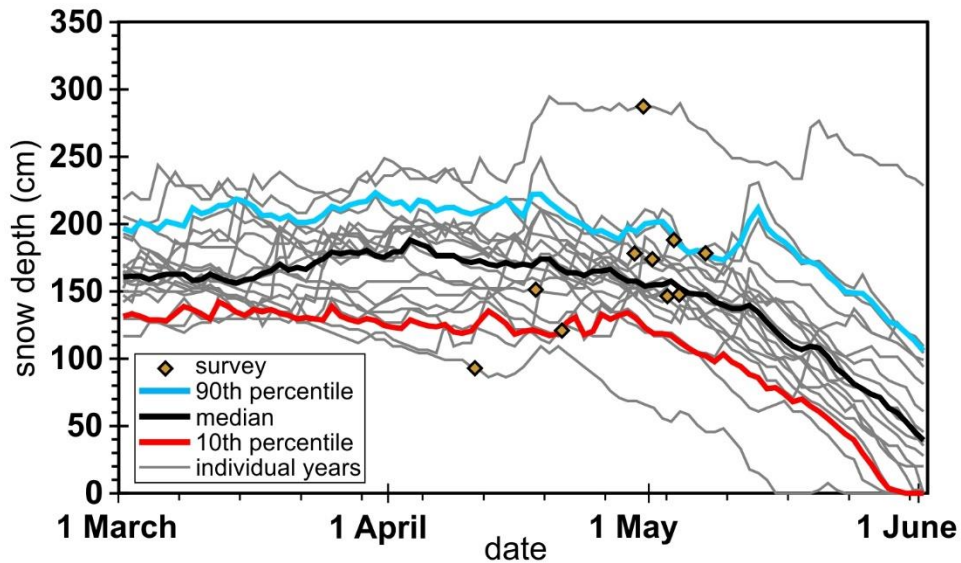

Figure S3. Snow survey dates plotted on top of snow depth data from the Brooklyn Lake SNOTEL site for years 2005 through 2020. The red symbols are the survey dates and associated SNOTEL date values.
