# Supplementary material for: Snowpack Distribution Using Topographical, Climatological and Winter Season Index Inputs
Source: MDPI journal article supplement (doi:10.3390/atmos13010003), 2021-12-21
Supplement: s1 [file s1]

Archive with 1 entries (1 files):
- atmosphere-1460275-supplementary.pdf
